# Supplementary material for: Influence of Tunneled Hemodialysis-Catheters on Inflammation and Mortality in Dialyzed Patients
Source: MDPI journal article supplement (doi:10.3390/ijerph18147605), 2021-07-16
Supplement: s1 [file s1]

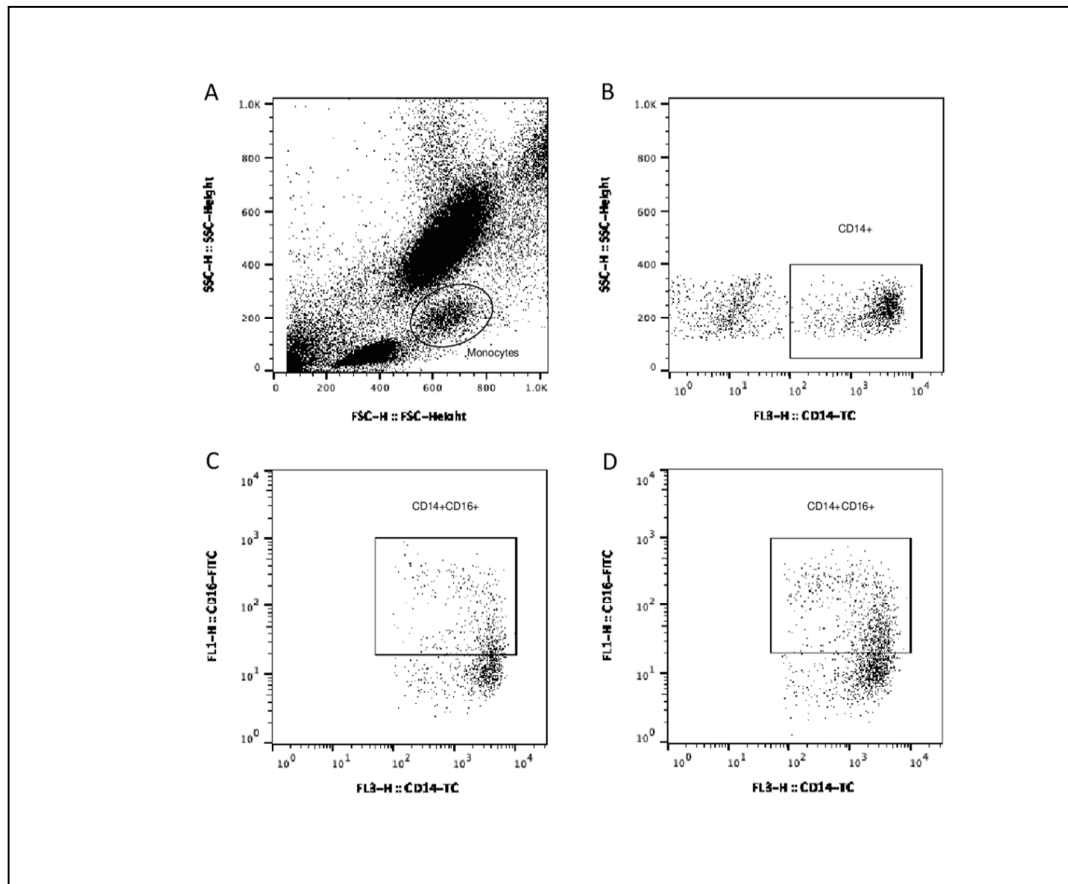

**Figure S1. Representative flow cytometry analysis.** (A) Monocytes were identified based on their forward scatter (FSC)-Height and side scatter (SSC)-Height characteristics. (B) Monocyte gate was further visualized in an SSC-Height versus CD14-TC plot to discriminate monocytes of other leukocytes that are not of interest. Subsequently, CD14+CD16+ monocytes within CD14+ population were assessed using CD16-FITC versus CD14-TC plot. Representative dot plot CD14+CD16+ expression in (C) AVF and (D) catheter CKD patients.
